# Supplementary material for: YY1 suppresses FEN1 over-expression and drug resistance in breast cancer
Source: PubMed Central journal article supplement (PMC4348373; doi:10.1186/s12885-015-1043-1), 2015-02-13
Supplement: 12885_2015_1043_MOESM1_ESM.pdf [file 12885_2015_1043_MOESM1_ESM.pdf]

**Supplemental Table S1. Correlation between FEN1 or YY1 expression and clinicopathologic variables**

| Variables            | Total<br>n (%) | YY1 high, n (%)<br>high, n=285 | P     | FEN1 high, n (%)<br>high, n=268 | P     |
|----------------------|----------------|--------------------------------|-------|---------------------------------|-------|
| Age years            |                |                                |       |                                 |       |
| Median               | 51             |                                | 0.384 |                                 | 0.251 |
| Range                | 26-76          |                                |       |                                 |       |
| T status             |                |                                |       |                                 |       |
| T1                   | 94(32.6)       | 22(23.4)                       | 0.922 | 70(82.4)                        | 0.305 |
| T2-4                 | 191(66.3)      | 45(23.9)                       |       | 139(76.8)                       |       |
| N status             |                |                                |       |                                 |       |
| N0                   | 130(45.1)      | 31(24.2)                       | 0.747 | 96(80.0)                        | 0.457 |
| N+                   | 156(54.2)      | 35(22.6)                       |       | 112(76.2)                       |       |
| Stage                |                |                                |       |                                 |       |
| 1&2                  | 217(75.3)      | 54(25.2)                       | 0.199 | 158(78.6)                       | 0.82  |
| 3                    | 68(23.6)       | 12(17.6)                       |       | 51(77.3)                        |       |
| ER                   |                |                                |       |                                 |       |
| Negative             | 161(55.9)      | 27(17.1)                       | 0.007 | 120(77.9)                       | 0.932 |
| Positive             | 124(43.1)      | 38(30.6)                       |       | 86(77.5)                        |       |
| PR                   |                |                                |       |                                 |       |
| Negative             | 149(51.7)      | 18(12.2)                       | 0.000 | 106(76.3)                       | 0.616 |
| Positive             | 133(46.2)      | 46(34.8)                       |       | 97(78.9)                        |       |
| HR                   |                |                                |       |                                 |       |
| Negative             | 121(42.0)      | 15(12.6)                       | 0.000 | 88(76.5)                        | 0.679 |
| Positive             | 164(56.9)      | 50(30.7)                       |       | 118(78.7)                       |       |
| Her-2                |                |                                |       |                                 |       |
| Negative             | 181(62.8)      | 48(27.0)                       | 0.109 | 128(75.7)                       | 0.24  |
| Positive             | 104(36.1)      | 18(17.3)                       |       | 80(81.6)                        |       |
| Triple-negative      |                |                                |       |                                 |       |
| Non- triple-negative | 210(72.9)      | 56(26.8)                       | 0.030 | 153(78.9)                       | 0.575 |
| Triple-negative      | 78(27.1)       | 11(14.5)                       |       | 56(75.7)                        |       |
| Taxane               |                |                                |       |                                 |       |
| Never                | 205(71.2)      | 47(23.0)                       | 0.768 | 148(77.5)                       | 0.758 |
| Ever                 | 83(28.8)       | 20(24.7)                       |       | 61(79.2)                        |       |
| Standard therapy     |                |                                |       |                                 |       |
| Standard therapy     | 253(87.8)      | 60(24.0)                       | 0.791 | 187(79.6)                       | 0.108 |
| Non-std. therapy     | 32(11.1)       | 7(21.9)                        |       | 20(66.7)                        |       |
| Dcis                 |                |                                |       |                                 |       |
| Invasive             | 279(96.9)      | 66(23.9)                       | 0.375 | 204(78.8)                       | 0.099 |
| Dcis                 | 9(3.1)         | 1(11.1)                        |       | 5(55.6)                         |       |
| FEN1                 |                |                                |       |                                 |       |
| Low                  | 59 (20.5)      | 9 (15.5)                       | 0.089 | -                               | -     |
| High                 | 209 (72.6)     | 55 (26.3)                      |       | -                               |       |
| YY1                  |                |                                |       |                                 |       |
| Low                  | 218 (75.5)     | -                              | -     | 154(75.9)                       | 0.089 |
| High                 | 67(23.3)       | -                              |       | 55(85.9)                        |       |

**Supplemental Table S2. Univariate and multivariate analyses of OS according to clinicopathologic variables**

| Biomarkers       | Univariate |              |       | Multivariate |             |       |
|------------------|------------|--------------|-------|--------------|-------------|-------|
|                  | Hazard     | 95%CI        | P     | Hazard       | 95%CI       | P     |
| Age              | 0.993      | 0.963-1.024  | 0.674 |              |             |       |
| T stage          | 2.064      | 1.064-4.006  | 0.032 |              |             |       |
| N stage          | 3.184      | 1.675-6.051  | 0.000 |              |             |       |
| Stage            | 4.315      | 2.524-7.377  | 0.000 | 4.534        | 2.638-7.794 | 0.000 |
| ER               | 0.699      | 0.401-1.218  | 0.206 |              |             |       |
| PR               | 0.650      | 0.373-1.130  | 0.127 |              |             |       |
| HR               | 0.708      | 0.411-1.220  | 0.214 |              |             |       |
| Her-2            | 1.716      | 1.063-2.768  | 0.027 |              |             |       |
| Triple-negative  | 1.135      | 0.623-2.068  | 0.678 |              |             |       |
| Taxane           | 1.287      | 0.721-2.298  | 0.393 |              |             |       |
| Standard therapy | 1.561      | 0.758-3.217  | 0.227 |              |             |       |
| Dcis             | 0.047      | 0.000-36.425 | 0.368 |              |             |       |

**Supplemental Table S3. Univariate and multivariate analyses of OS according to biomarkers adjusted by selected clinicopathologic variables**

| Biomarkers | Univariate |             |       | Multivariate |             |       |
|------------|------------|-------------|-------|--------------|-------------|-------|
|            | Hazard     | 95%CI       | P     | Hazard       | 95%CI       | P     |
| FEN1-high  | 1.822      | 0.819-4.054 | 0.141 | 1.978        | 0.888-4.407 | 0.095 |
| YY1-high   | 0.675      | 0.340-1.340 | 0.261 | 0.722        | 0.359-1.453 | 0.361 |
| FEN1/YY1   | 1.944      | 1.065-3.546 | 0.030 | 2.06         | 1.121-3.782 | 0.020 |

**Supplemental Table S4. Univariate and multivariate analyses of DFS according to clinicopathologic variables**

| Risk factors     | Univariate |             |       | Multivariate |             |       |
|------------------|------------|-------------|-------|--------------|-------------|-------|
|                  | Hazard     | 95%CI       | P     | Hazard       | 95%CI       | P     |
| Age              | 0.989      | 0.965-1.013 | 0.370 |              |             |       |
| T stage          | 1.595      | 0.962-2.644 | 0.070 |              |             |       |
| N stage          | 2.570      | 1.574-4.197 | 0.000 |              |             |       |
| Stage            | 3.592      | 2.315-5.574 | 0.000 | 3.600        | 2.311-5.608 | 0.000 |
| ER               | 0.892      | 0.573-1.386 | 0.610 |              |             |       |
| PR               | 0.802      | 0.515-1.250 | 0.330 |              |             |       |
| HR               | 0.880      | 0.568-1.365 | 0.569 |              |             |       |
| Her-2            | 1.687      | 1.149-2.476 | 0.008 | 1.515        | 1.003-2.288 | 0.048 |
| Triple-negative  | 0.820      | 0.491-1.369 | 0.447 |              |             |       |
| Taxane           | 1.483      | 0.943-2.335 | 0.088 |              |             |       |
| Standard therapy | 1.002      | 0.501-2.007 | 0.994 |              |             |       |
| Dcis             | 0.047      | 0.000-7.969 | 0.243 |              |             |       |

**Supplemental Table S5. Univariate and multivariate analyses of DFS according to biomarkers adjusted by selected clinicopathologic variables**

| Biomarkers | Univariate |             |       | Multivariate |             |       |
|------------|------------|-------------|-------|--------------|-------------|-------|
|            | Hazard     | 95%CI       | P     | Hazard       | 95%CI       | P     |
| FEN1-high  | 1.662      | 0.898-3.076 | 0.105 | 1.842        | 0.844-4.020 | 0.125 |
| YY1-high   | 0.599      | 0.337-1.066 | 0.081 | 0.550        | 0.296-1.024 | 0.059 |
| YY1/FEN1   | 1.988      | 1.221-3.235 | 0.006 | 2.085        | 2.421-5.997 | 0.007 |

**Supplemental Table S6. All the DNA oligonucleotides used in the current study**

| Name                    | Sequence                                                                                                  | Experiments                         |
|-------------------------|-----------------------------------------------------------------------------------------------------------|-------------------------------------|
| Probe a                 | 5'-biotin-GGAGTTCATGGCAAGGGGCTTCCCC<br>CTTCCCCACCCTTCAGCCCAAGCCGGAGGTCCA -3                               | Biotinylated DNA<br>pull-down assay |
| Probe b                 | 5'-biotin-CGTCTGGAActCCCCTCAACGCTCT<br>CACCATTTGCCCGCGAAGGCTAATCCGCCGCT-3                                 | Biotinylated DNA<br>pull-down assay |
| Probe c                 | 5'-biotin-GGCGCCTAGCACAAACCGAAAAGGAAG<br>TGCCTCCG GCGCAAGTGGCATTGAGGGACTTG-3                              | Biotinylated DNA<br>pull-down assay |
| Probe b <sub>SNP</sub>  | 5'-biotin-CGTCTGGAActCCCCTCAACGCTCT<br>CTCCATCTTGTCCCAGCGAAGGCTAATCCGCCGCT-3                              | Biotinylated DNA<br>pull-down assay |
| Probe Random            | 5'-biotin-ATGCATGCATGCATGCATGCATGCA<br>TGCATGCATGCATGCATGCATGCATGCATGCATG-3                               | Biotinylated DNA<br>pull-down assay |
| YY1(pCDNA3.1(-))        | Forward: GGTACC ATGGCCTCGGGCGACACCCT<br>Reverse: GATATC TACTGGTTGTTTTGGCC                                 | Plasmid<br>Construction             |
| YY1(pCMV7.0-<br>3*Flag) | Forward: GTCGAC GCCTCGGGCGACACCCTCTA<br>Reverse: TCTAGA TACTGGTTGTTTTGGCC                                 | Plasmid<br>Construction             |
| pGL4.1-EGFP             | Forward: AAGCTT GGCAATCCGGTACTGTTGGT<br>AAAGCCACC ATGGTGAGCAAGGG<br>Reverse: TCTAGA TTACTTGTACAGCTCGTCCAT | Plasmid<br>Construction             |
| FEN1                    | Forward: TGGAGCGAGCCAAATGAA<br>Reverse: GCCGGTCACCTTGAAGAAA                                               | qRT-PCR                             |
| YY1                     | Forward: CGACTACATTGAACAAACGCTG<br>Reverse: CGTTTCCCACAGCCTTCG                                            | qRT-PCR                             |
| EGFP                    | Forward: CTTCTTGCCGTAGTTCCAC<br>Reverse: ACTGGGTGCTCAGGTAGTGG                                             | qRT-PCR                             |
| GAPDH                   | Forward: GGGGAGCCAAAAGGTCATCATCT<br>Reverse: GAGGGGCCATCCACAGTCTTCT                                       | qRT-PCR                             |
| Probe N                 | 5'-biotin-ATCGATCGATCGATCGATCGATCGATCG-3'                                                                 | EMSA                                |
| Probe P(Probe b)        | 5'-biotin-CGTCTGGAActCCCCTCAACGCTCTCACC<br>ATTTTGCCCGCGAAGGCTAATCCGCCGCT-3'                               | EMSA                                |
| WT FEN1                 | 5'-biotin-AACGCTCTCACCATTTTGCCCGCGAAG-3'                                                                  | EMSA                                |
| MUT FEN1                | 5'-biotin-AACGCTCTCAGCaTTTGCCCGCGAAG-3'                                                                   | EMSA                                |
| FEN1(YY1)               | Forward: TGAGGAGATAAGCGCGGTGT<br>Reverse: AGGCACTTCCTTTTCCGGTT                                            | ChIP/qRT-PCR                        |
| FEN1CDS                 | Forward: TGGAGCGAGCCAAATGAA<br>Reverse: GCCGGTCACCTTGAAGAAA                                               | ChIP/qRT-PCR                        |
| ACTB                    | Forward: GCATAGCAGACATAACAACGGAC<br>Reverse: GCACCTTTTACCCTGGAGC                                          | ChIP/qRT-PCR                        |
